# Supplementary material for: CALCR exacerbates renal cell carcinoma progression via stabilizing CD44
Source: Aging (Albany NY). 2024 Jul 9;16(13):10765–83. doi: 10.18632/aging.205586 (PMC11272109; doi:10.18632/aging.205586)
Supplement: Supplementary Figure 1 [file aging-16-205586-s001.pdf]

## SUPPLEMENTARY FIGURE

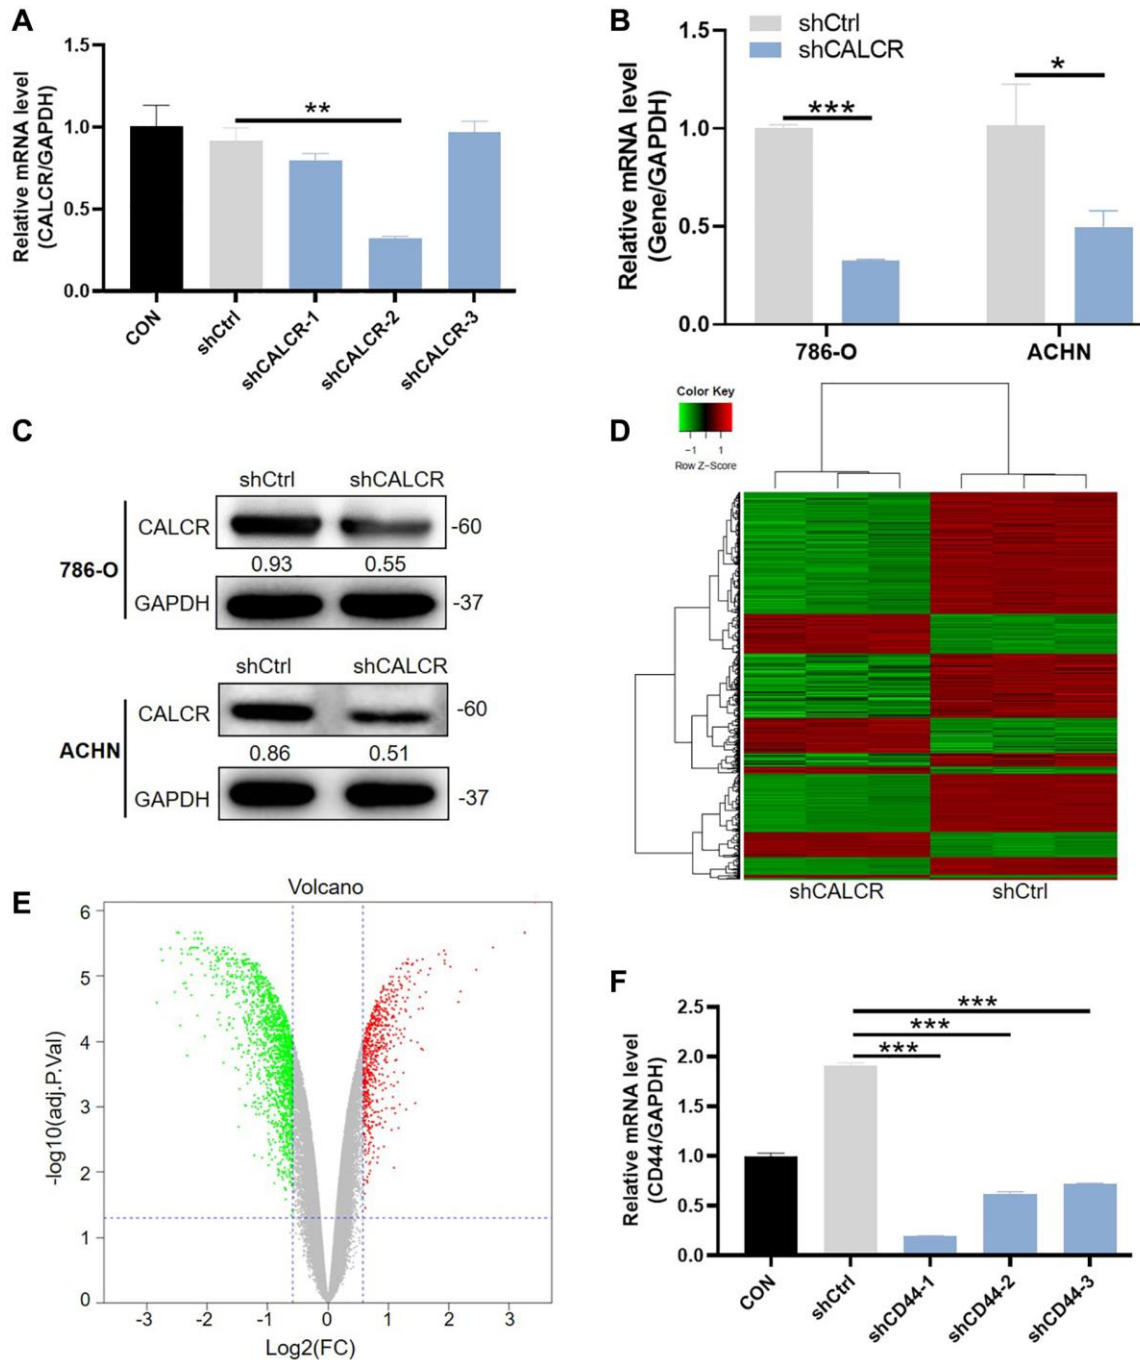

**Supplementary Figure 1.** (A) Screening for the shCALCR with the best knockdown efficiency (shCALCR-2). (B) CALCR deficiency in 786-O and ACHN cells were confirmed by qPCR and (C) western blot assays. (D) The heat map and (E) volcano plot showed the DEGs between shCALCR-depleted and control 786-O cells. Red represents the upregulated genes, green represents the downregulated genes. (F) Screening for the shCD44 with the best knockdown efficiency (shCD44-1).
