# Supplementary material for: CALCR exacerbates renal cell carcinoma progression via stabilizing CD44
Source: publisher site journal article supplement (doi:10.18632/aging.205586), 2024-07-09
Supplement: Supplementary file [file aging-v16i13-205586-supplementary-material-SD2.pdf]

## SUPPLEMENTARY TABLES

**Supplementary Table 1. Target sequences of shRNAs.**

| Gene  | No.       | Target sequence (5'–3') |
|-------|-----------|-------------------------|
| CALCR | shCALCR-1 | GAGGAATGAACCAGCCAACAA   |
| CALCR | shCALCR-2 | TGGGTCATTCTTTGTCAATTT   |
| CALCR | shCALCR-3 | CAAATCAAACCTATCCAACAA   |
| CD44  | shCD44-1  | AAGCTCTGAGCATCGGATTTG   |
| CD44  | shCD44-2  | TTGAATATAACCTGCCGCTTT   |
| CD44  | shCD44-3  | CCGCTGACCTCTGCAAGGCTT   |

Abbreviations: CALCR: calcitonin receptor; CD44: cluster of differentiation.

**Supplementary Table 2. Primers used in qPCR.**

| Primer name | Forward primer sequence (5'–3') | Reverse primer sequence (5'–3') |
|-------------|---------------------------------|---------------------------------|
| CALCR       | CCGGTGAGCTGCAAGATTT             | AGCCACGACAATGAGTGTATGA          |
| ACVR1       | TCTGTAGTGTTCGCAGTATGT           | ATTGAGGCGTTCCTTGTT              |
| CD44        | TGGGTTTCATAGAAGGGCACG           | ATACTGGGAGGTGTTGGATGTG          |
| EGFR        | ATGAGGACATAACCAGCCACC           | AGGCACGAGTAACAAGCTCAC           |
| GAB2        | TGGACAACAGCCGACTTCA             | GGAAAGAGCCAACCTCCATCAC          |
| IL1R1       | GTGGCTGAAAAGCATAGAGGG           | GTCTCATTAGCTGGGCTCACA           |
| ITGA2       | GGCGACGAAGTGCTACGAAA            | CCCAAGAAGTCTATGCCAAAC           |
| ITGA3       | CCCACTCACTGCCACAAGG             | CCACAGTCACTCCAAGCCACAT          |
| ITGB3       | CGGCAGGTGGAGGATTAC              | CTTTCGCATCTGGGTGGC              |
| MAPK1       | GACTGGACGTGCTCAGACAT            | CCTCCAAACGGCTCAAAGGA            |
| TGFBR1      | GTCATCACCTGGCCTTGCTC            | GGTCCTCTTCATTTGGCACTC           |
| NFKBIA      | CTCCATCCTGAAGGCTACCAA           | GCACCCAAGGACACCAAAAAG           |
| TLR2        | TGACTCTACCAGATGCCTCCCT          | TTGCCACCAGCTTCCAAAG             |
| PIK3R1      | GAAGAAATTGGCTGGTTAAATGG         | CTGGTGCAACAGGAAGAGGC            |
| TNIK        | CGACATACCCAGACTGATAC            | AATACTGCCGCTGAAACT              |
| PPP2R1B     | TTAGCAAGTGGGGATTGGTTC           | GCATTTGATGCCCTGGGATAG           |
| FGF2        | AGCGACCCTCACATCAAGCT            | GCCAGGTAACGGTTAGCACA            |
| PTPN11      | CGGCAAGTCTAAAGTGACCC            | AATCAAACCGTTCTCCTCCAC           |
| COL8A1      | ATTCCTCCTCAGATGCCACCA           | GGACCTTGTTCCCCTCGTAAA           |
| SOS1        | GCCAGCCTCATTGTCCCTAA            | ACTGAAGGGGGTCCAATGTG            |
| GAPDH       | TGACTTCAACAGCGACACCCA           | CACCCTGTTGCTGTAGCCAAA           |

Abbreviations: ACVR1: activin a receptor type 1; CD44: cluster of differentiation 44; EGFR: epidermal growth factor receptor; GAB2: GABA receptor subunit beta; IL1R1: interleukin 1 receptor type 1; ITGA2: integrin subunit alpha 2; ITGA3: integrin subunit alpha 3; ITGB3: integrin subunit beta 3; MAPK1: mitogen-activated protein kinase 1; TGFBR1: transforming growth factor beta receptor type 1; NFKBIA: nuclear factor of kappa light polypeptide gene enhancer in B-Cells inhibitor alpha; TLR2: toll-like receptor 2; PIK3R1: phosphoinositide-3-kinase regulatory subunit 1; TNIK: TRAF2 and NCK interacting kinase; PPP2R1B: protein phosphatase 2 regulatory subunit alpha B; FGF2: fibroblast growth factor 2; PTPN11: protein tyrosine phosphatase non-receptor type 11; COL8A1: collagen type VIII alpha 1 chain; SOS1: son of sevenless homolog 1.

**Supplementary Table 3. Antibodies applied in IHC, WB, and ubiquitination assays.**

| <b>Antibody</b>  | <b>Diluted multiples</b> | <b>Company</b> | <b>Catalog No.</b> | <b>Use</b>     |
|------------------|--------------------------|----------------|--------------------|----------------|
| CALCR            | 1:50                     | Abcam          | ab230500           | IHC            |
| CALCR            | 1:1000                   | Abcam          | ab230500           | WB             |
| CD44             | 1:2000                   | Abcam          | ab157107           | WB             |
| CD44             | 1:2000                   | Proteintech    | 15675-1-AP         | Co-IP          |
| GAPDH            | 1:3000                   | Proteintech    | 60004-1-Ig         | WB             |
| Goat anti-Rabbit | 1:3000                   | Beyotime       | A0208              | WB             |
| Goat anti-Mouse  | 1:3000                   | Beyotime       | A0216              | WB             |
| Ubiquitin        | 1:2000                   | CST            | 3936S              | Ubiquitination |
